# Supplementary material
Source: PubMed Central journal article supplement (PMC10849688)
Supplement: i2331-348X-29-1-66_s01.pdf [file i2331-348X-29-1-66_s01.pdf]

## Recruitment of Study Sites.

An invitation was sent out on the following electronic platforms (listservs) soliciting participation:

- American College of Clinical Pharmacists (ACCP) Pediatric Practice and Research Network (PRN)
- ACCP Critical Care PRN
- ACCP Emergency Medicine PRN
- Pediatric Pharmacy Association (PPA) Emergency Department Special Interest Group (SIG)
- PPA NICU SIG listserv
- PPA Critical Care SIG

**Table S1.** Hypotension Definitions

| Age                                            | Hypotension definition                                                               |
|------------------------------------------------|--------------------------------------------------------------------------------------|
| Corrected gestational age <30 wk               | MAP < 30 mm Hg                                                                       |
| Corrected gestational age 30 to <40 wk         | MAP less than the patient's corrected gestational age                                |
| Corrected gestational age ≥40 wk and age ≤1 mo | SBP <60 mm Hg or MAP <40 mm Hg                                                       |
| Patient age >1 mo                              | SBP less than the sum of 70 + (age × 2) or MAP less than the sum of 40 + (1.5 × age) |

MAP, mean arterial pressure; SBP, systolic blood pressure

**Table S2.** Induction Agent(s) Administered

| Medication Administered                                 | Value, n (%)     |
|---------------------------------------------------------|------------------|
| NICU patients receiving an induction agent (n = 56)     | 56 of 108 (51.9) |
| Induction agent administered alone (n = 37)             | 37 of 56 (66.1)  |
| Fentanyl                                                | 31               |
| Midazolam                                               | 5                |
| Morphine                                                | 1                |
| Medication combination administered (n = 19)            | 19 of 56 (33.9)  |
| Midazolam + Fentanyl                                    | 15               |
| Midazolam + morphine                                    | 4                |
| Non-NICU patients receiving an induction agent (n = 63) | 63 of 64 (98.4)  |
| Induction agent administered alone (n = 39)             | 39 of 63 (61.9)  |
| Fentanyl                                                | 16               |
| Ketamine                                                | 7                |
| Etomidate                                               | 7                |
| Propofol                                                | 6                |
| Midazolam                                               | 3                |
| Medication combination administered (n = 24)            | 24 of 63 (38.1)  |
| Midazolam + fentanyl                                    | 9                |
| Ketamine + fentanyl                                     | 6                |
| Ketamine + propofol                                     | 2                |
| Ketamine + midazolam                                    | 3                |
| Etomidate + fentanyl                                    | 2                |
| Etomidate + propofol                                    | 1                |
| Etomidate + midazolam + fentanyl                        | 1                |

NICU, neonatal intensive care unit

**Table S3.** Post–Rapid Sequence Intubation (RSI) Medication Administration

| Variable                                                  | Result          |
|-----------------------------------------------------------|-----------------|
| All patients (n = 172)                                    |                 |
| Received a medication within 120 min after RSI, n (%)**   | 81 of 172 (47)  |
| Received sedation and analgesia, n (%)                    | 32 of 81 (39.5) |
| Received analgesia alone, n (%)                           | 30 of 81 (37)   |
| Received sedation alone, n (%)                            | 19 of 81 (23.5) |
| Intubation time to initiation of sedation, median (IQR)†  | 42 (15–89)      |
| Intubation time to initiation of analgesia, median (IQR)‡ | 37 (12–66)      |
| Non-depolarizing NMBA for RSI (n = 79)§                   |                 |
| Received a medication with 120 min after RSI, n (%)¶      | 66 of 79 (83.5) |
| Received sedation and analgesia, n (%)                    | 28 of 66 (42.4) |
| Received analgesia alone, n (%)                           | 21 of 66 (31.8) |
| Received sedation alone, n (%)                            | 16 of 66 (24.2) |
| Intubation time to initiation of sedation, median (IQR)†  | 42 (15.5–83)    |
| Intubation time to initiation of analgesia, median (IQR)† | 41 (13–66)      |

NMBA, neuromuscular blocking agent; NICU, neonatal intensive care unit

\* Agents used: fentanyl (44), midazolam (23), dexmedetomidine (20), morphine (17), propofol (10), ketamine (8), lorazepam (4).

† NICU patients received analgesia or sedative agent within the first 120 minutes after RSI less often than non-NICU patients, 25 of 108 (23%) vs 57 of 64 (89%),  $p < 0.001$ .

‡ Intubation time to initiation of sedation and/or analgesia calculated in those patients who were not receiving these agents at the time of RSI.

§ A similar proportion of NICU patients undergoing RSI with an NMBA received an analgesia or sedative agent within the first 120 minutes after RSI compared with non-NICU patients, 16 of 20 (80%) vs 57 of 64 (89%),  $p < 0.46$ .

¶ Agents used: fentanyl (38), midazolam (19), dexmedetomidine (16), morphine (12), propofol (9), ketamine (5), lorazepam (4).
